# Supplementary material for: Effects of Additives on Electrochromic Properties of Nanocrystalline Tungsten Oxide Films Prepared by Complexation-Assisted Sol–Gel Method
Source: MDPI journal article supplement (doi:10.3390/ma16072681), 2023-03-28
Supplement: s1 [file s1]

---

## Supporting Information:

# Effects of Additives on Electrochromic Properties of Nanocrystalline Tungsten Oxide Films Prepared by Complexation-Assisted Sol–Gel Method

Dan Zhou \*, Zhibo Tong, Hongmei Xie, Jiaotong Sun and Fenggui Chen

Chongqing Key Laboratory of Extraordinary Bond Engineering and Advanced Materials Technology,  
College of Materials Science and Engineering, Yangtze Normal University, Chongqing 408100, China

\* Correspondence: zhoudan@yznu.edu.cn; Tel.: +86-023-72791828

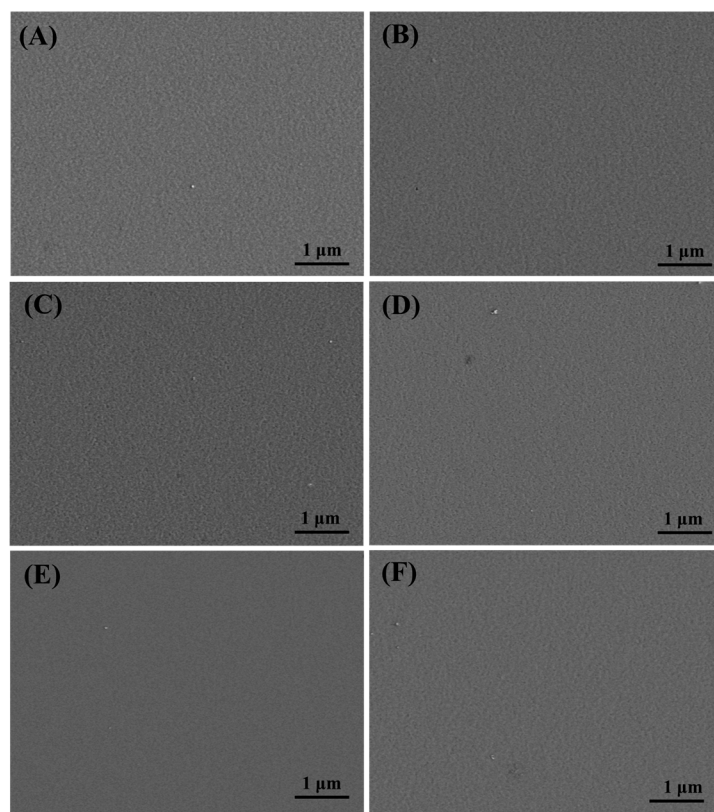

**Figure S1.** FESEM images of (A) WO<sub>3</sub>-300 °C, (B) WO<sub>3</sub>/DA-300 °C, (C) WO<sub>3</sub>/CA-300 °C, (D) WO<sub>3</sub>/TA-300 °C, (E) WO<sub>3</sub>/Ph-300 °C, and (F) WO<sub>3</sub>/PEA-300 °C films.

---
